# Supplementary material for: Enhancing catalytic aerobic oxidation performance of cyclohexaneviasize regulation of mixed-valence {V16} cluster-based metal–organic frameworks
Source: Royal Society of Chemistry journal article supplement (doi:10.1039/c9nj03614h), 2019-01-01
Supplement: c9nj03614h1.pdf [file c9nj03614h1.pdf]

## Supporting Information

### Enhancing Catalytic Aerobic Oxidation Performance of Cyclohexane via Size Regulation of Mixed-Valence {V<sub>16</sub>} Clusters-Based Metal-Organic Framework

Shuang Wang<sup>†</sup>, Zhixia Sun<sup>†</sup>, Xinyu Zou<sup>†</sup>, Zhijuan Zhang<sup>†</sup>, Guoyuan Fu<sup>†</sup>, Lei Li<sup>†</sup>, Xue Zhang<sup>†</sup>, Fang Luo<sup>†, \*</sup>

<sup>†</sup>Key Laboratory of Polyoxometalate Science of the Ministry of Education, College of Chemistry, Northeast Normal University, Jilin 130024, P. R. China.

The nucleation and growth equations are expressed as the following:

$$\frac{dN}{dt} = \beta \exp\left[-\frac{A}{\ln^2 s}\right] \dots \dots \dots (S1)$$

$$A = \frac{16\pi\sigma^3\gamma^2}{3(\kappa T)^3}; s = \frac{C}{C_{eq}} a \dots \dots \dots (S2)$$

$\beta$ : Pre-finger factor

A: Parameters related to solid-liquid interface energy

$\sigma$ : Solid-liquid interface energy

$\gamma$ : Compound molecular volume

$\kappa$ : Constant T: Temperature

S: Supersaturation

C: Actual concentration of compound

$C_{eq}$ : Saturated concentration of compound

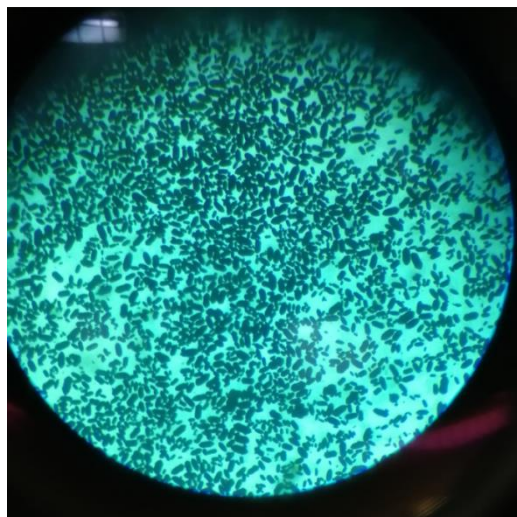

**Fig.S1.** The physical map of NENU-MV-1 grains with 2 mm.

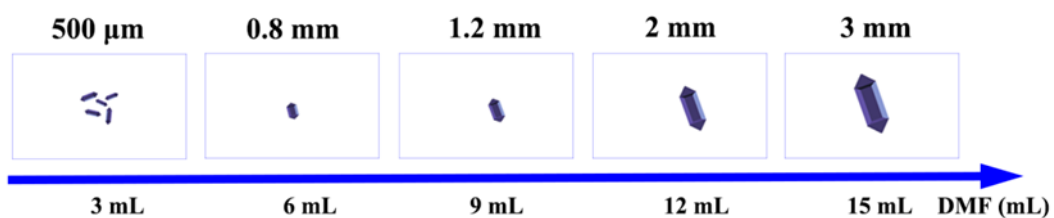

**Fig. S2.** Size evolution of NENU-MV-1 with increasing the volume of DMF.

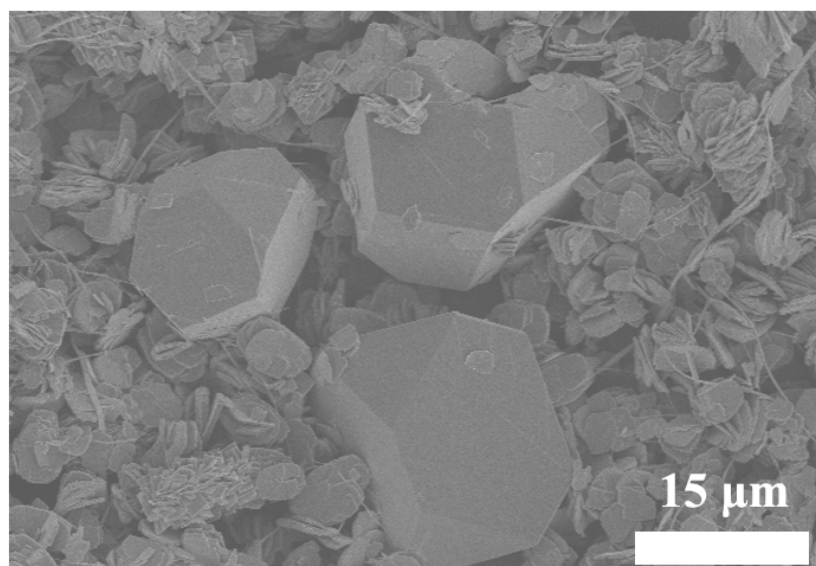

**Fig. S3.** The SEM images of NENU-MV-1 when the ratio of DMF to water is in the range of 2.5~4.

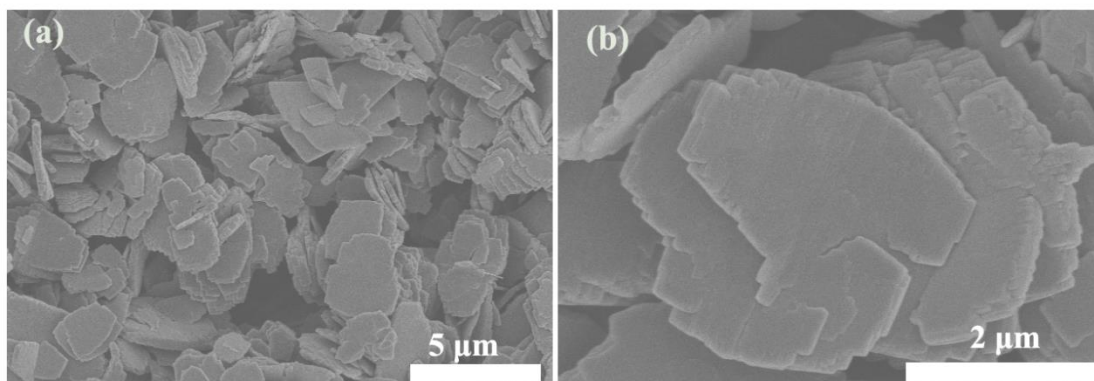

**Fig. S4.** (a). Wide range SEM images of dark green powders. (b). Small range SEM images of dark green powders.

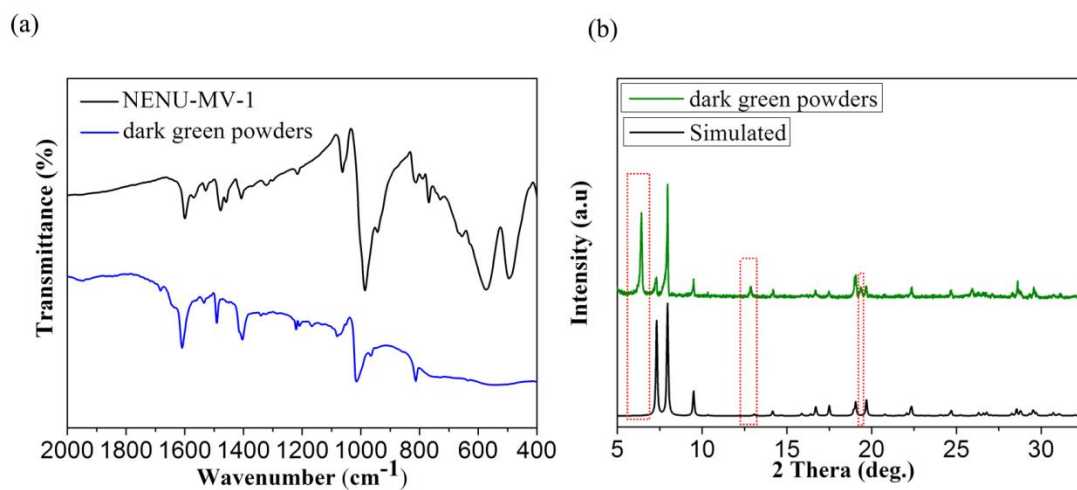

**Fig. S5.** (a). FT-IR measurements of dark green powders and NENU-MV-1. (b) The powder X-ray diffraction patterns of simulated and dark green powders.

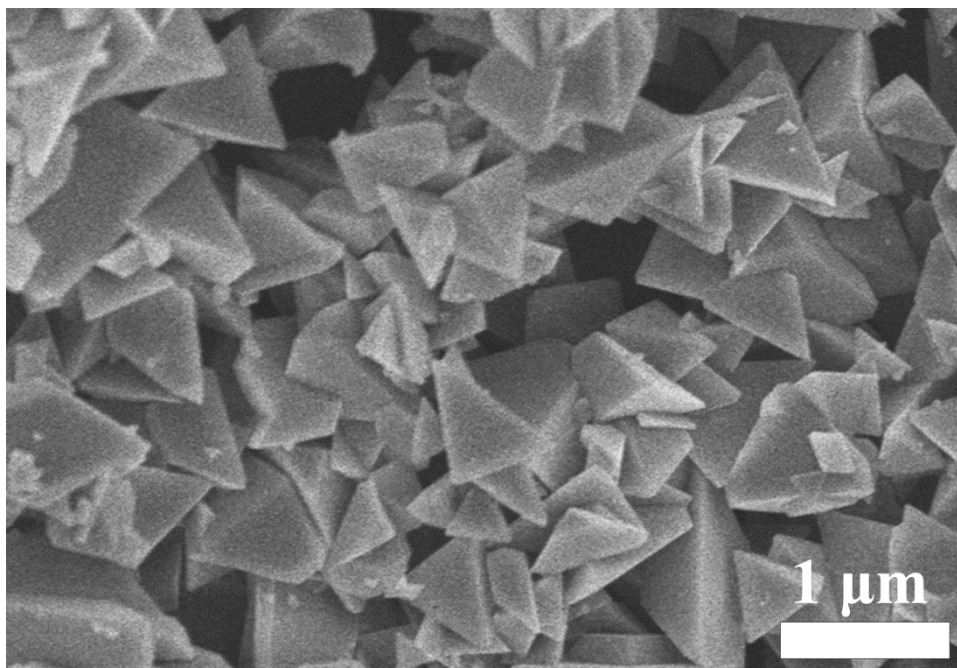

**Fig. S6.** The SEM images of NENU-MV-1 with 500 nm through increasing the molar ratio of ligand to nickel ions to 1.5.

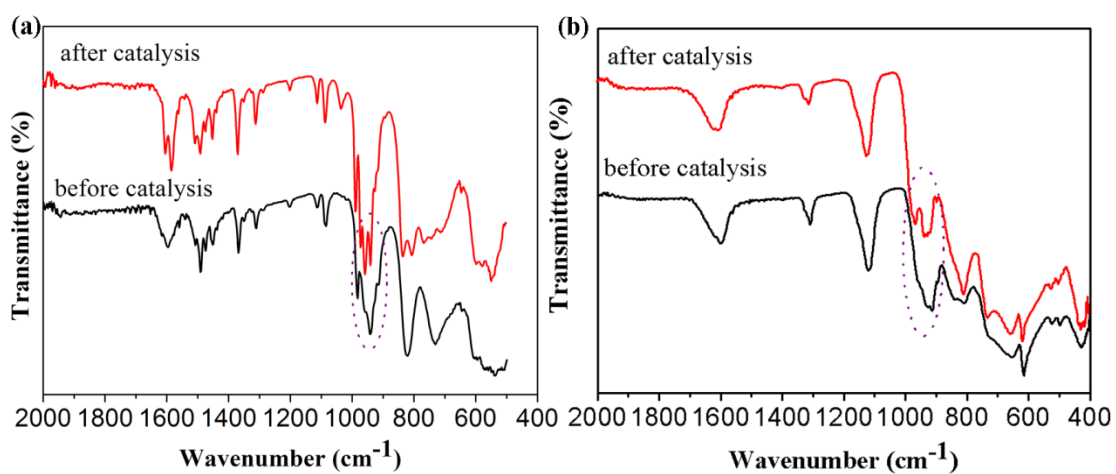

**Fig. S7.** (a) FT-IR measurements of  $[\text{C}_8\text{H}_{17}\text{N}(\text{CH}_3)_3]_3\text{H}_3\text{V}_{10}\text{O}_{28}$  before and after catalysis, respectively. (b) FT-IR measurements of  $\text{K}_{12}[\text{V}^{\text{IV}}_{18}\text{O}_{42}(\text{H}_2\text{O})] \cdot 16\text{H}_2\text{O}$  before and after catalysis, respectively.

**Table S1.** Effect of Reaction Pressure with NENU-MV-1-500 nm

| Entry | Reaction pressure (Mpa) | Conversion (%) | KA selectivity (%) | K/A (molar ratio) |
|-------|-------------------------|----------------|--------------------|-------------------|
| 1     | 1.0                     | 24.6           | 99.9               | 0.63              |
| 2     | 1.2                     | 26.8           | 82.7               | 0.72              |
| 3     | 1.5                     | 30.1           | 74.6               | 0.80              |
| 4     | 1.8                     | 32.2           | 68.1               | 0.87              |

Reaction conditions: cyclohexane (5 ml), NENU-MV-1-500 nm (50 mg), 150 °C, 2 h, oxygen atmosphere.

**Table S2.** Effect of Reaction Temperature with NENU-MV-500 nm

| Entry | Reaction temperature (°C) | Conversion (%) | KA selectivity (%) | K/A (molar ratio) |
|-------|---------------------------|----------------|--------------------|-------------------|
| 1     | 150                       | 24.6           | 99.9               | 0.63              |
| 2     | 155                       | 25.8           | 87.2               | 0.68              |
| 3     | 160                       | 28.4           | 80.4               | 0.71              |
| 4     | 180                       | 31.6           | 71.5               | 0.82              |

Reaction conditions: cyclohexane (5 ml), NENU-MV-1-500 nm (50 mg), 2 h, oxygen pressure (1 Mpa).

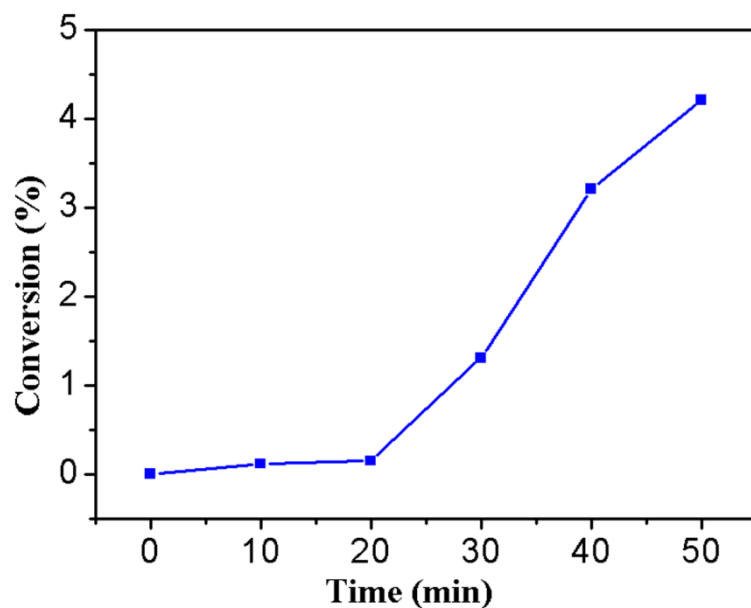

**Fig. S8.** Time course of the initial reaction rate of cyclohexane oxidation with NENU-MV-1-500 nm: cyclohexane (5 ml), catalyst (50 mg), O<sub>2</sub> (1 Mpa), 150 °C, Time (1 h).

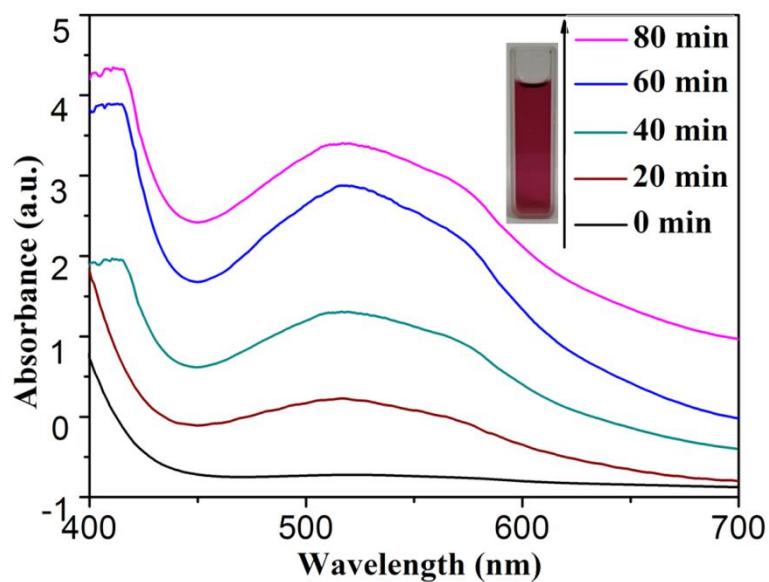

**Fig. S9.** UV-Vis adsorption spectrum of NBT with NENU-MV-1-500 nm as catalyst.



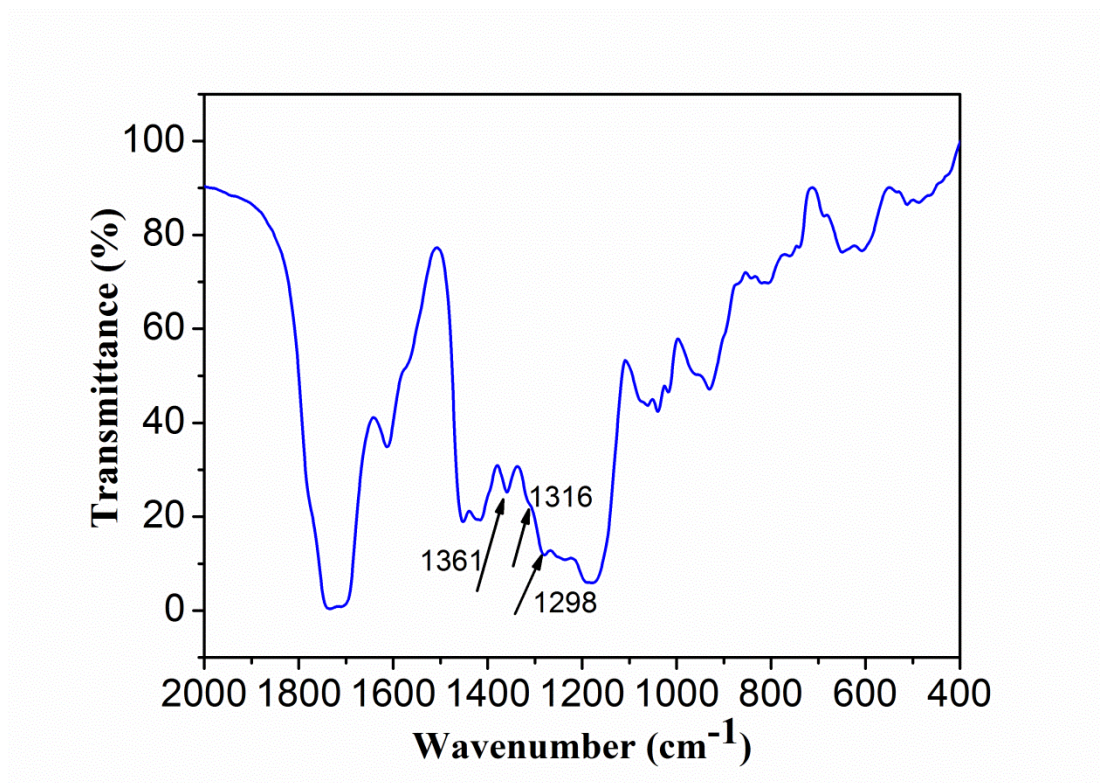

**Fig. S10.** FT-IR spectrum of the solution after 2 h of reaction of cyclohexane using NENU-MV-1-500 nm as the catalyst. The peaks at 1361, 1316, and 1298 cm<sup>-1</sup> can be assigned to the vibrational modes of cyclohexyl hydroperoxide.

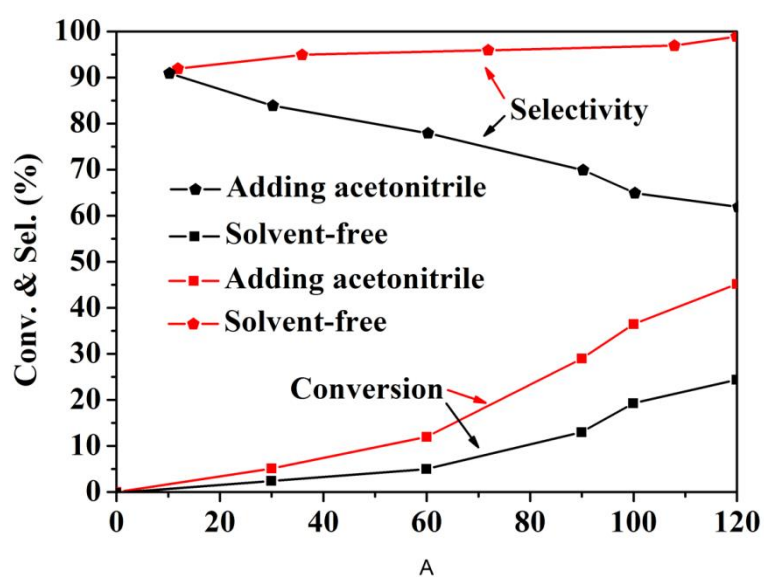

**Fig. S11.** Time course of the oxidation of cyclohexane with 10 atm O<sub>2</sub> catalyzed by

NENU-MV-1-500 nm under acetonitrile as a solvent and solvent-free conditions, respectively.

**Table S3. Catalytic Performance of Different Catalysts for the Oxidation of Cyclohexane**

| Catalysts                                            | Time (h) | Tem. (°C) | Pressure (Mpa) | Con. (%) | Sel. (%) | Publishing magazine                      |
|------------------------------------------------------|----------|-----------|----------------|----------|----------|------------------------------------------|
| Au <sub>75</sub> Pd <sub>25</sub> alloy icosahedrons | 48       | 125       | 1.0            | 28.1     | 84.3     | Nano Lett. 2015, 15, 2875-2880           |
| Au <sub>75</sub> Pd <sub>25</sub> alloy octahedrons  | 48       | 125       | 1.0            | 9.5      | 84.0     | Nano Lett. 2015, 15, 2875-2880           |
| Au-Pd/MIL-101                                        | 4        | 150       | 1.0            | 45.4     | 84.2     | ACS Catal. 2013, 3, 647-654              |
| CoD(p-Cl)PPCl/ZnO                                    | 2        | 155       | 1.0            | 6.23     | 89.4     | Ind. Eng. Chem. Res. 2015, 54, 2425-2430 |
| Cr-HMS                                               | 4        | 140       | 0.5            | 7.69     | 46.6     | Ind. Eng. Chem. Res. 2010, 49, 5392-5399 |
| V-HMS                                                | 4        | 140       | 0.5            | 9.34     | 92.4     |                                          |
| Ti-HMS                                               | 4        | 140       | 0.5            | 9.04     | 76.1     |                                          |
